# Supplementary material for: Preparing electrochemical active hierarchically porous carbons for detecting nitrite in drinkable water
Source: Royal Society of Chemistry journal article supplement (doi:10.1039/c5ra22116a), 2016-01-01
Supplement: c5ra22116a1.pdf [file c5ra22116a1.pdf]

## Supporting Information

### Preparing Electrochemical Active Hierarchically Porous Carbons for Detecting Nitrite in Drinkable Water

Baojun Ding, Hong Wang, Shengyang Tao\*, Yuchao Wang and Jieshan Qiu  
Department of Chemistry, Dalian University of Technology, Dalian, Liaoning 116024,  
China.

\* Corresponding author. Tel: +86-411-84986035. E-mail: [taosy@dlut.edu.cn](mailto:taosy@dlut.edu.cn)

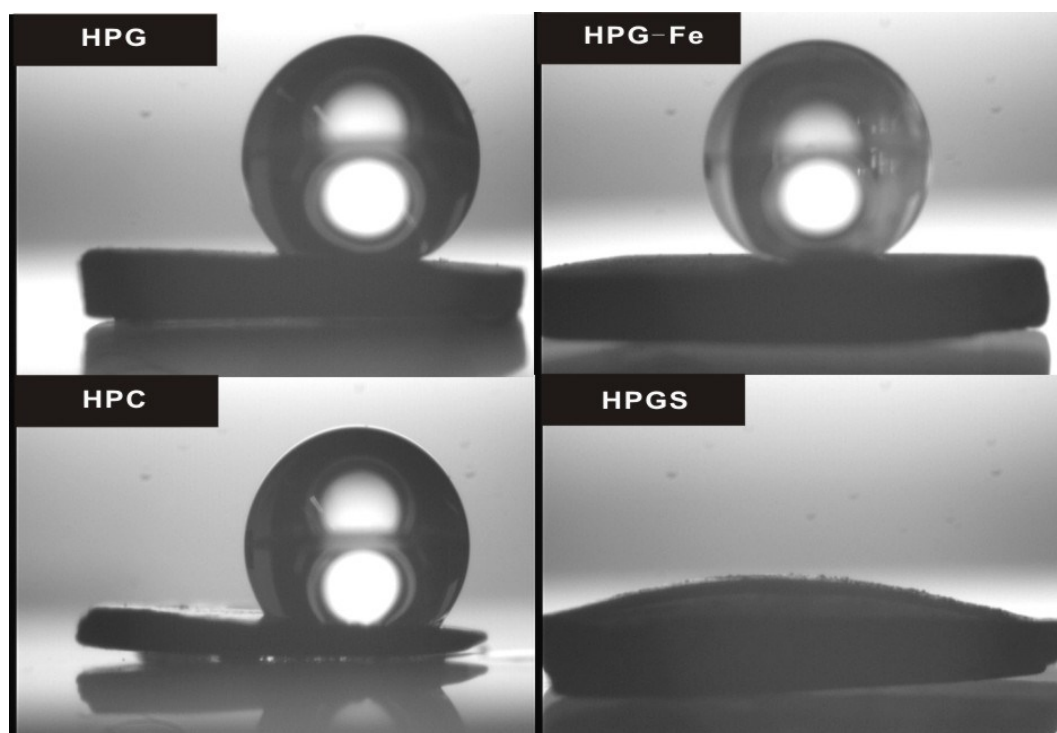

**Fig. S1** The images of the water contact angles.

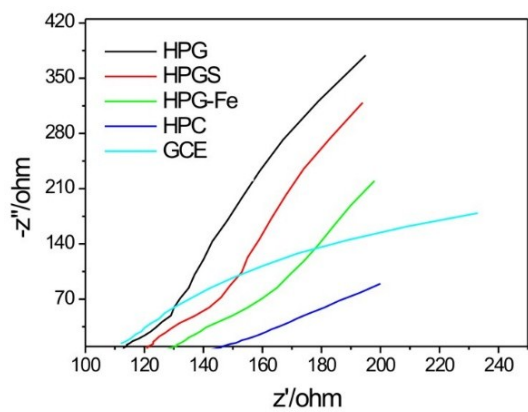

**Fig. S2** The magnifying image of low Nyquist plot part.

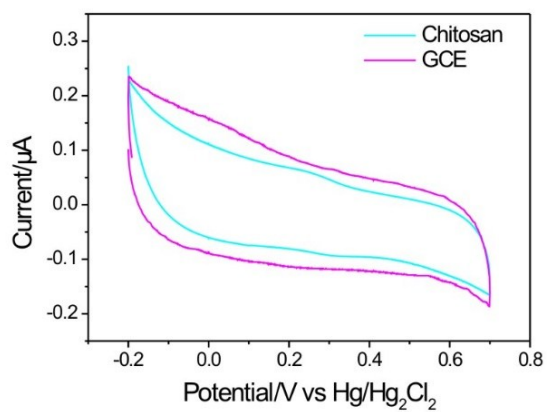

**Fig. S3** CVs of chitosan electrode and bare GCE in 0.1 M KCl.

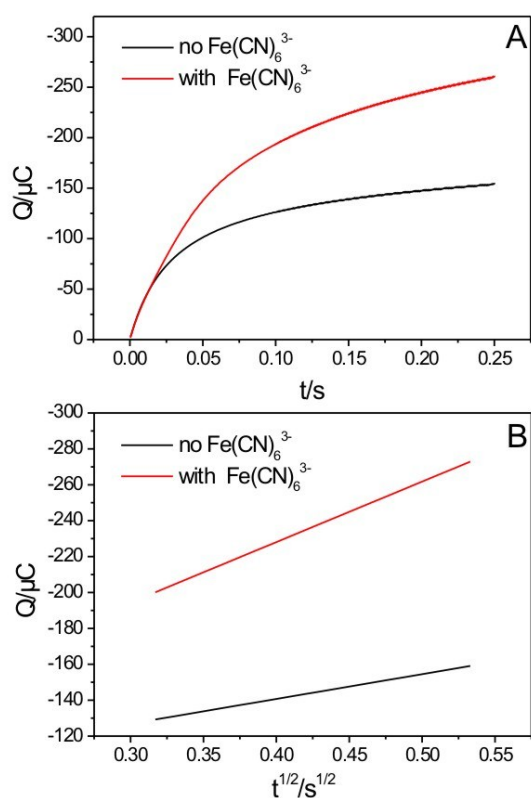

**Fig. S4 (A)** Chronocoulometric response curves in the absence and presence of 10nM  $\text{Fe}(\text{CN})_6^{3-}$  in 0.1 M KCl. **(B)** The corresponding  $Q$ - $t^{1/2}$  plots. The surface excess of  $\text{Fe}(\text{CN})_6^{3-}$  could be calculated based on the integrated Cottrell equation,<sup>1</sup>

$$Q = \frac{2nFAD_0^{1/2}c_0^*}{\pi^{1/2}}t^{1/2} + Q_{dl} + nFA\Gamma_0$$

where  $Q_{dl}$  is the capacitive charge, and  $\Gamma$  is the surface excess. Other symbols have their usual meaning. The surface excess of  $\text{Fe}(\text{CN})_6^{3-}$  was calculated as being  $1.153 \times 10^{-9} \text{ mol/cm}^2$ .

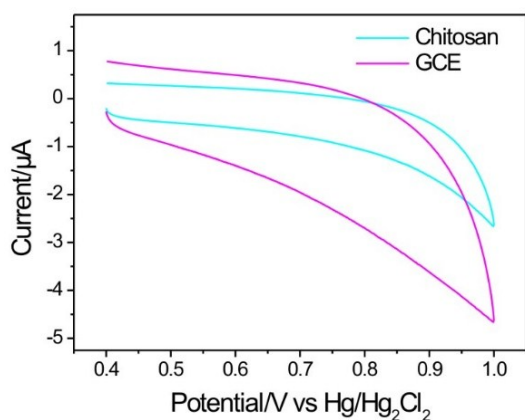

**Fig. S5** CVs of chitosan electrode and bare GCE in 0.1 M PBS buffer solution (PH=7).

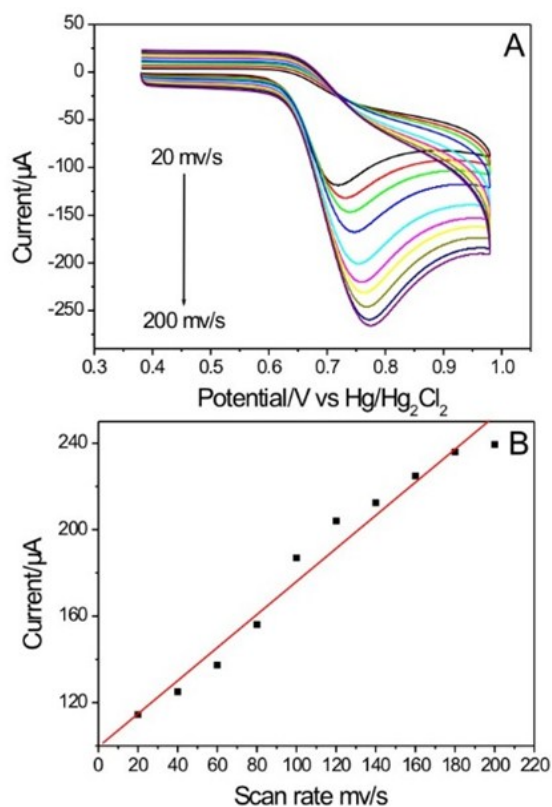

**Fig. S6** (A) CVs of the integrated HPG electrode in 3.5mM nitrite at a scan rate ranging from 20 to 200 mV s<sup>-1</sup>. (B) The plot of peak current versus scan rates. The current was proportional to scan rate and the corresponding linearity equation is  $I(\mu\text{A})=0.7647v \text{ (mv/s)}+99.54$ , suggesting that the electrode reactions of nitrite were predominantly a surface-controlled processes on the HPG electrode.

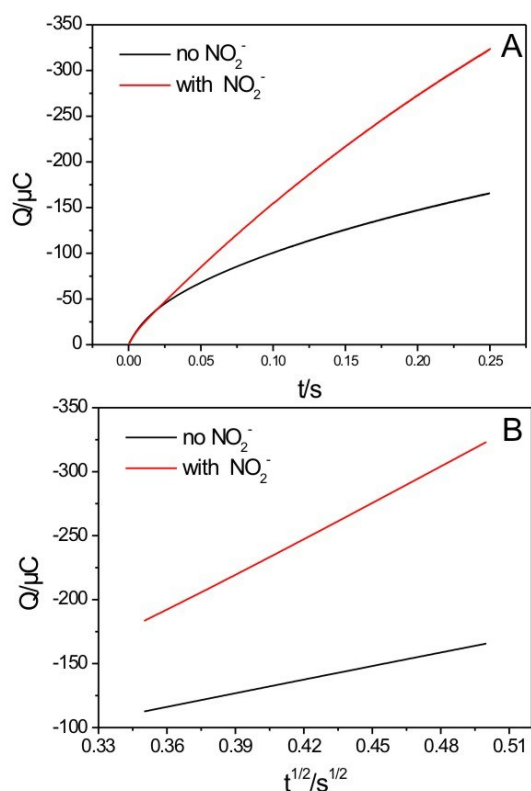

**Fig. S7 (A)** Chronocoulometric response curves in the absence and presence of 10mM  $\text{NO}_2^-$  in 0.1 M PBS buffer solution (PH=7). **(B)** The corresponding  $Q$ - $t^{1/2}$  plots. The surface excess of nitrite was calculated as being  $9.844 \times 10^{-9}$  mol/cm<sup>2</sup> with the same method as Fig. S4

Table S1 Comparison of several electrochemical sensors for nitrite determination.

| modified electrode     | PH  | detection range (mM)     | LOD ( $\mu\text{M}$ ) | determination in real samples                          | ref       |
|------------------------|-----|--------------------------|-----------------------|--------------------------------------------------------|-----------|
| CuO/graphite electrode | 4.0 | 0.01-1.25                | 0.6                   | —                                                      | 2         |
| CDP-GS-MWCNTs /GCE     | 6.0 | 0.005-6.75               | 1.65                  | River water                                            | 3         |
| CTAB-GO/GCE            | 7.0 | 0.005-0.8                | 1.5                   | Urine                                                  | 4         |
| GO-COOLa/GCE           | 5.0 | 0.001-2.75               | 0.07                  | Urine and Serum                                        | 5         |
| La-MWCNTs/GCE          | 6.0 | 0.0004-0.71              | 0.13                  | Urine and Serum                                        | 6         |
| CR-GO/GCE              | 5.0 | 0.0089-0.167             | 1.0                   | river water, tap water and rain water                  | 7         |
| Pt-PANI-GE/GCE         | 7.2 | 0.0004-0.99<br>0.99-7.01 | 0.13                  | tap water                                              | 8         |
| HPG electrode          | 7.0 | 0.2-0.8<br>2-10          | 8.1                   | tap water, lake water, mineral water, juice, pure milk | this work |

Abbreviations:

LOD: limit of detection; CuO: copper oxide; CDP: cross linked cyclodextrin; GS: graphene sheets; MWCNT: multiwalled carbon nanotubes; CTAB-GO: Hexadecyl trimethyl ammonium bromide functionalized graphene oxide; GO-COOLa: carboxylated graphene oxide/Lanthanum; CR-GO: chemically reduced graphene oxide; Pt-PANI-GE: Pt-Polyaniline-graphene nanocomposites.

## Notes and references

- 1 A. B. Steel, T. M. Herne and M. Tarlov, *J. Anal. Chem.*, 1998, **70**, 4670.
- 2 B. Sljukic, C. E. Banks, A. Crossley, and R. G. Compton, *Electroanalysis*, 2007, **19**, 79-84.
- 3 D. Zhang, Y. Fang, Z. Miao, M. Ma, X. Du, S. Takahashib, J. Anzaib, and Q. Chen, *Electrochim. Acta.*, 2013, **107**, 656-663.
- 4 Y. Yang, W. Li, *Biosens. Bioelectron.*, 2014, **56**, 300.
- 5 F. Ye, C. Feng, J. Jiang, and S. sheng, *Electrochim. Acta.*, 2015, **182**, 935-945.
- 6 W. Zhang, R. Yuan, Y. Chai, Y. Zhang, and S. Chen, *Sens. Actuators, B.*, 2012, **601**, 166-167
- 7 V. Mani, A. P. Periasamy and S. Chen, *Electrochem. Commun.*, 2012, **17**, 75-78
- 8 S, Zhang, B, Li and J. Zheng, *Anal. Methods.*, 2015, **7** (19), 8366-8372.
